# Supplementary material for: Genetic characterization of Cryptosporidium spp. in Hotan Black Chickens in China reveals two novel subtypes of Cryptosporidium meleagridis
Source: PubMed Central journal article supplement (PMC9645226; doi:10.1051/parasite/2022051), 2022-11-09
Supplement: parasite-29-50-s1.pdf [file parasite-29-50-s1.pdf]

1 **Table S1: Subtype of *C. meleagridis*.**

| Family | Gene bank       | Subtype      | Host                | Country        | References               |                        |
|--------|-----------------|--------------|---------------------|----------------|--------------------------|------------------------|
| IIIa   | MH062746        | IIIaA22G3R1  | Chicken             | Brazil         | da Cunha et al., 2018    |                        |
|        | AF401499        | IIIaA24G3R1a | Turkey              | USA            | Glaberman et al., 2001   |                        |
|        | AF401500        | IIIaA24G3R1b | Humans              | Kenya          | Glaberman et al.,2001    |                        |
| IIIb   | KF733821        | IIIbA13G1    | Humans              | Peru           | Wang et al., 2014        |                        |
|        | AF401501        | IIIbA13G1R1  | Humans              | Peru           | Glaberman et al.,2001    |                        |
|        | KF733822        | IIIbA15G1    | Bird                | Peru           | Wang et al., 2014        |                        |
|        | KJ210613        | IIIbA19G1R1  | Humans              | Thailand       | Stensvold et al., 2014   |                        |
|        | AB539720        | IIIbA20G1R1  | Humans              | Japan          | Abe et al., 2010         |                        |
|        | KJ210610        | IIIbA21G1R1a | Humans              | Sweden         | Stensvold et al., 2014   |                        |
|        | KJ210618        | IIIbA21G1R1b | Humans              | Thailand       | 7-Stensvold et al., 2014 |                        |
|        | MT569393        | IIIbA21G1R1d | Water               | China          | Jiang et al., 2020       |                        |
|        | MG969391        | IIIbA22G1R1  | Chicken             | China          | Liao et al., 2018        |                        |
|        | AF401502        | IIIbA22G1R1a | Turkey              | USA            | Glaberman et al.,2001    |                        |
|        | AB539719        | IIIbA22G1R1b | Humans              | Japan          | Stensvold et al., 2014   |                        |
|        | KJ210617        | IIIbA22G1R1c | Humans              | Thailand       | Stensvold et al., 2014   |                        |
|        | KJ210606        | IIIbA23G1R1a | Humans              | Indonesia      | Stensvold et al., 2014   |                        |
|        | KJ210609        | IIIbA23G1R1b | Humans              | Thailand       | Stensvold et al., 2014   |                        |
|        | KU852727        | IIIbA23G1R1c | Humans              | Malaysia       | Unpublished              |                        |
|        | KJ210612        | IIIbA23G2R1  | Humans              | Indonesia      | Stensvold et al., 2014   |                        |
|        | MT952948        | IIIbA23G4R1  | Humans              | Australia      | Unpublished              |                        |
|        | KF733818        | IIIbA24G1    | Humans              | Peru           | Wang et al., 2014        |                        |
|        | KU852729        | IIIbA24G1R1  | Humans              | China          | Unpublished              |                        |
|        | KF733816        | IIIbA26G1    | Humans              | Peru           | Wang et al., 2014        |                        |
|        | MN746323        | IIIbA26G1R1  | Humans              | Colombia       | Galvan-Diaz et al., 2020 |                        |
|        | AF401498        | IIIbA26G1R1a | Human(HIV)          | Kenya          | Glaberman et al.,2001    |                        |
|        | JQ029726        | IIIbA26G1R1b | Human(HIV)          | China          | Wang et al., 2013        |                        |
|        | KF733817        | IIIbA27G1    | Bird                | Peru           | Wang et al., 2014        |                        |
|        | JF691562        | IIIbA27G1R1  | Humans              | China          | Wang et al., 2013        |                        |
|        | JQ029725        | IIIbA29G1R1  | Humans              | China          | Wang et al., 2013        |                        |
|        | KF733819        | IIIbA30G1    | Humans              | Peru           | Wang et al., 2014        |                        |
|        | KF733820        | IIIbA34G1    | Humans              | Peru           | Wang et al., 2014        |                        |
|        | IIIc            | KF733815     | IIIcA6              | Humans         | Peru                     | Wang et al., 2014      |
|        |                 | JF495149     | IIIcA6R1            | Humans         | India                    | Stensvold et al., 2014 |
| IIId   | MW159785        | IIIdA6       | Humans              | Malawi         | Huston et al., 2021      |                        |
|        | JF495148        | IIIdA6R1     | Humans              | India          | Stensvold et al., 2014   |                        |
| IIIe   | AB539718        | IIIeA16G2R1  | Humans              | Japan          | Stensvold et al., 2014   |                        |
|        | KP703169        | IIIeA16G2R1b | Alectoris rufa      | Czech Republic | Máca et al., 2015        |                        |
|        | KU221105        | IIIeA16G2R1c | Phasianus colchicus | Czech Republic | Máca et al., 2016        |                        |
|        | KJ210608        | IIIeA17G2R1  | humans              | Sweden         | Stensvold et al., 2014   |                        |
|        | MG516778        | IIIeA18G2R1  | Bird                | Australia      | Zahedi et al., 2018      |                        |
|        | KJ210620        | IIIeA19G2R1  | humans              | Uzbekistan     | Stensvold et al., 2014   |                        |
|        | AB539721        | IIIeA20G1R1  | cockatiel           | Japan          | Stensvold et al., 2014   |                        |
|        | AB539717        | IIIeA20G2R1  | cockatiel           | Japan          | Stensvold et al., 2014   |                        |
|        | <u>KJ672091</u> | IIIeA21G2R1  | chicken             | China          | Unpublished              |                        |

|       |          |                |               |           |                           |
|-------|----------|----------------|---------------|-----------|---------------------------|
|       | JX416370 | IIIeA22G2R1    | dairy cattle  | China     | Zhang et al., 2013        |
|       | KJ210605 | IIIeA25G2R1    | Humans        | India     | Stensvold et al., 2014    |
|       | JF691563 | IIIeA26G2R1    | humans        | China     | Wang et al., 2013         |
| III f | EU164813 | III f A16G2R2  | humans        | Australia | Stensvold et al., 2014    |
| III g | JX878613 | III g A18G4R1  | bird          | Algeria   | Baroudi et al., 2013      |
|       | JX878614 | III g A19G5R1  | bird          | Algeria   | Baroudi et al., 2013      |
|       | MH062749 | III g A21G3R1a | Chicken       | Brazil    | da Cunha et al., 2018     |
|       | MH062750 | III g A21G3R1b | Chicken       | Brazil    | da Cunha et al., 2018     |
|       | KU852730 | III g A22G3R1  | Humans        | Nepal     | Unpublished               |
|       | KY352483 | III g A22G3R1  | Gallus gallus | Algeria   | Elkarim et al., 2017      |
|       | JQ349257 | III g A23G3R1  | humans        | Spain     | Stensvold et al., 2014    |
|       | JX878610 | III g A24G2R1  | bird          | Algeria   | Baroudi et al., 2013      |
|       | MH062752 | III g A25G3R1  | Chicken       | Brazil    | da Cunha et al., 2018     |
|       | OK562699 | III g A25G3R1a | chicken       | China     | Unpublished               |
|       | JX878611 | III g A26G3R1a | bird          | Algeria   | Baroudi et al., 2013      |
|       | JQ349258 | III g A26G3R1b | Humans        | UK        | Stensvold et al., 2014    |
|       | KJ210619 | III g A31G3R1  | Humans        | Sweden    | Stensvold et al., 2014    |
| III h | KU831548 | III h A7       | Humans        | UK        | Unpublished               |
|       | JQ349259 | III h A24G3R1  | Humans        | UK        | Abal-Fabeiro et al., 2013 |
| III i | JQ349260 | III i A23G3R1  | Humans        | UK        | Abal-Fabeiro et al., 2013 |

## 2 References:

- 3 Abal-Fabeiro JL, Maside X, Bello X, Llovo J, Bartolomé C. Multilocus patterns of genetic variation across  
4 *Cryptosporidium* species suggest balancing selection at the gp60 locus. *Mol Ecol.* 2013 Sep;22(18):4723-32.
- 5 Abe N. Genotype analysis of *Cryptosporidium meleagridis* isolates from humans in Japan. *Jpn J Infect Dis.* 2010  
6 May;63(3):214-5.
- 7 Baroudi D, Khelef D, Goucem R, Adjou KT, Adamu H, Zhang H, Xiao L. Common occurrence of zoonotic pathogen  
8 *Cryptosporidium meleagridis* in broiler chickens and turkeys in Algeria. *Vet Parasitol.* 2013 Sep 23;196(3-4):334-40.
- 9 da Cunha MJR, Cury MC, Santín M. Molecular characterization of *Cryptosporidium* spp. in poultry from Brazil. *Res Vet*  
10 *Sci.* 2018 Jun;118:331-335. doi: 10.1016/j.rvsc.2018.03.010. Epub 2018 Mar 21. PMID: 29605466.
- 11 Elkarim Laatamna A, Holubova N, Sak B, Kvac M. *Cryptosporidium meleagridis* and *C. baileyi* (Apicomplexa) in domestic  
12 and wild birds in Algeria. *Folia Parasitol (Praha).* 2017 Jun 13;64:2017.018. doi: 10.14411/fp.2017.018. PMID:  
13 28620152.
- 14 Galvan-Diaz AL, Bedoya-Urrego K, Medina-Lozano A, Uran-Velasquez J, Alzate JF, Garcia-Montoya G. Common  
15 occurrence of *Cryptosporidium hominis* in children attending day-care centers in Medellin, Colombia. *Parasitol Res.*  
16 2020 Sep;119(9):2935-2942. doi: 10.1007/s00436-020-06782-5. Epub 2020 Jun 27. PMID: 32594239.
- 17 Glaberman S, Sulaiman IM, Bern C, Limor J, Peng MM, Morgan U, Gilman R, Lal AA, Xiao L. A multilocus genotypic  
18 analysis of *Cryptosporidium meleagridis*. *J Eukaryot Microbiol.* 2001;Suppl:19S-22S.
- 19 Huston CD. The Clofazimine for Treatment of Cryptosporidiosis in HIV-Infected Adults (CRYPTOFAZ) and Lessons  
20 Learned for Anticryptosporidial Drug Development. *Clin Infect Dis.* 2021 Jul 15;73(2):192-194. doi:  
21 10.1093/cid/ciaa425. PMID: 32277815; PMCID: PMC8427724.
- 22 Jex AR, Whipp M, Campbell BE, Cacciò SM, Stevens M, Hogg G, Gasser RB. A practical and cost-effective mutation  
23 scanning-based approach for investigating genetic variation in *Cryptosporidium*. *Electrophoresis.* 2007  
24 Nov;28(21):3875-83.
- 25 Jiang W, Roellig DM, Li N, Wang L, Guo Y, Feng Y, Xiao L. Contribution of hospitals to the occurrence of enteric protists  
26 in urban wastewater. *Parasitol Res.* 2020 Sep;119(9):3033-3040. doi: 10.1007/s00436-020-06834-w. Epub 2020 Aug 4.  
27 PMID: 32748039.

- 28 Liao C, Wang T, Koehler AV, Fan Y, Hu M, Gasser RB. Molecular investigation of *Cryptosporidium* in farmed chickens in  
29 Hubei Province, China, identifies 'zoonotic' subtypes of *C. meleagridis*. *Parasit Vectors*. 2018 Aug 29;11(1):484. doi:  
30 10.1186/s13071-018-3056-5. PMID: 30157928; PMCID: PMC6114272.
- 31 Máca O, Pavlásek I. *Cryptosporidium* infections of ring-necked pheasants (*Phasianus colchicus*) from an intensive artificial  
32 breeding programme in the Czech Republic. *Parasitol Res*. 2016 May;115(5):1915-22.
- 33 Máca O, Pavlásek I. First finding of spontaneous infections with *Cryptosporidium baileyi* and *C. meleagridis* in the  
34 red-legged partridge *Alectoris rufa* from an aviary in the Czech Republic. *Vet Parasitol*. 2015 Apr 30;209(3-4):164-8.
- 35 Muthusamy D, Rao SS, Ramani S, Monica B, Banerjee I, Abraham OC, Mathai DC, Primrose B, Muliyl J, Wanke CA,  
36 Ward HD, Kang G. Multilocus genotyping of *Cryptosporidium* sp. isolates from human immunodeficiency  
37 virus-infected individuals in South India. *J Clin Microbiol*. 2006 Feb;44(2):632-4.
- 38 Stensvold CR, Beser J, Axén C, Lebbad M. High applicability of a novel method for gp60-based subtyping of  
39 *Cryptosporidium meleagridis*. *J Clin Microbiol*. 2014 Jul;52(7):2311-9.
- 40 Wang L, Zhang H, Zhao X, Zhang L, Zhang G, Guo M, Liu L, Feng Y, Xiao L. Zoonotic *Cryptosporidium* species and  
41 *Enterocytozoon bieneusi* genotypes in HIV-positive patients on antiretroviral therapy. *J Clin Microbiol*. 2013  
42 Feb;51(2):557-63.
- 43 Wang Y, Yang W, Cama V, Wang L, Cabrera L, Ortega Y, Bern C, Feng Y, Gilman R, Xiao L. Population genetics of  
44 *Cryptosporidium meleagridis* in humans and birds: evidence for cross-species transmission. *Int J Parasitol*. 2014  
45 Jul;44(8):515-21.
- 46 Zahedi A, Monis P, Gofton AW, Oskam CL, Ball A, Bath A, Bartkow M, Robertson I, Ryan U. *Cryptosporidium* species and  
47 subtypes in animals inhabiting drinking water catchments in three states across Australia. *Water Res*. 2018 May  
48 1;134:327-340. doi: 10.1016/j.watres.2018.02.005. Epub 2018 Feb 6. PMID: 29438893.
- 49 Zhang W, Wang R, Yang F, Zhang L, Cao J, Zhang X, Ling H, Liu A, Shen Y. Distribution and genetic characterizations of  
50 *Cryptosporidium* spp. in pre-weaned dairy calves in Northeastern China's Heilongjiang Province. *PLoS One*.  
51 2013;8(1):e54857.
- 52
